# Supplementary material
Source: publisher site journal article supplement (https://www.dovepress.com/article/402931)
Supplement: Supplementary file 1 [file get_supplementary_file.php]

**Supplement 1. Search strategy for identification of studies to be included in the review**

| **Search strategy**  #1 ("erector spinae plane block"[Title/Abstract] OR "erector spinae block"[Title/Abstract] OR "ESP block"[Title/Abstract] OR "ESPB"[Title/Abstract]  #2 ("spine"[Title/Abstract]) OR "spinal"[Title/Abstract] OR "lumbar"[Title/Abstract] OR "lumbar surgery"[Title/Abstract] OR "lumbar spine surgery"[Title/Abstract] OR "lumbar spinal surgery"[Title/Abstract] OR "spine surgery"[Title/Abstract] OR "spinal surgery"[Title/Abstract]  #3 (#1 AND #2) |
| --- |

1)597 articles were identified: PubMed- 131, Cochrane- 174, Embase- 140, Web of science- 152

2)348 relevant citations screened by title and abstract

3)31 articles assessed for eligibility

4)19 articles were included for meta-analysis after removing 12 articles with reasons by reading full-text, 9 of which were retrospective studies, 1 was published in Chinese language, 1 was cervical spinal surgery, and 1 was thoracolumbar spinal surgery.
